# Supplementary material for: Novel reactions of homodinuclear Ni2complexes [Ni(RNPyS4)]2with Fe3(CO)12to give heterotrinuclear NiFe2and mononuclear Fe complexes relevant to [NiFe]- and [Fe]-hydrogenases
Source: Royal Society of Chemistry journal article supplement (doi:10.1039/c5dt00067j), 2015-01-01
Supplement: c5dt00067j1.pdf [file c5dt00067j1.pdf]

## Supporting Information

**Novel reactions of homodinuclear Ni<sub>2</sub> complexes [Ni(RN<sub>Py</sub>S<sub>4</sub>)]<sub>2</sub> with Fe<sub>3</sub>(CO)<sub>12</sub> to give heterotrinnuclear NiFe<sub>2</sub> and mononuclear Fe complexes relevant to [NiFe]- and [Fe]-hydrogenases**

Li-Cheng Song,\* Meng Cao and Yong-Xiang Wang

Department of Chemistry, State Key Laboratory of Elemento-Organic Chemistry, Collaborative Innovation Center of Chemical Science and Engineering (Tianjin), Nankai University, Tianjin 300071, China

**Contents:**









**(1) Preparation of 2,6-bis(hydroxymethyl)-4-*i*-propylpyridine**

**(2) Preparation of 2,6-bis[(tosyloxy)methyl]-4-*i*-propylpyridine**













- (2) Thermal decomposition experiment of 2a in refluxing CH<sub>2</sub>Cl<sub>2</sub> in air.**
- (3) Thermal decomposition experiments of 2b-2e in CH<sub>2</sub>Cl<sub>2</sub> at room temperature under N<sub>2</sub>.**
- (4) Thermal decomposition experiments of 2b-2e in CH<sub>2</sub>Cl<sub>2</sub> at room temperature in air.**





**4. Figures S1 and S2: Molecular structures of 2b and 3c**

**5. Figure S3: Plots of  $i_p$  versus  $v^{1/2}$  for 2a**





**7. Figures S5 and S6: Overpotential determinations for 2a-2e**

**8. Figure S7: Plot of  $i_p$  versus  $v^{1/2}$  for 3a**

**9. Figure S8: Cyclic voltammograms of 3b-3e with TFA**

**10. Figure S9: Overpotential determinations for 3a-3e**

**11. References**









### (1) Preparation of 2,6-bis(hydroxymethyl)-4-*i*-propylpyridine

This new precursor was prepared from the previously reported compound 2,6-bis(methoxycarbonyl)-4-*i*-propylpyridine.<sup>1</sup> A mixture consisting of 2,6-bis(methoxycarbonyl)-4-*i*-propylpyridine (2.373 g, 10 mmol), NaBH<sub>4</sub> (2.079 g, 55 mmol) and EtOH (100 mL) was stirred at 0 °C for 1 h, at room temperature for 1 h, and at reflux temperature for about 10 h until the fluorescence TLC analysis showed that the starting material 2,6-bis(methoxycarbonyl)-4-*i*-propylpyridine was completely consumed. To the resulting mixture was added acetone (20 mL) and then the mixture was refluxed for 1 h. After solvents were removed, a saturated aqueous Na<sub>2</sub>CO<sub>3</sub> solution (20 mL) was added and then the mixture was refluxed for 1 h. After the mixture was cooled to room temperature and water (50 mL) was added, the mixture was extracted with ethyl acetate (50 mL×4) and the combined organic phase was dried over anhydrous MgSO<sub>4</sub>. After removal of the drying agent and solvents, the residue was subjected to column chromatography on silica gel using MeOH/CH<sub>2</sub>Cl<sub>2</sub> (v/v = 1:10) as an eluent to give 2,6-bis(hydroxymethyl)-4-*i*-propylpyridine (1.285 g, 71%) as a white solid, mp 73–75 °C. Anal. Calcd for C<sub>10</sub>H<sub>15</sub>NO<sub>2</sub>: C, 66.27; H, 8.34; N, 7.73. Found: C, 66.09; H, 8.03; N, 7.62. IR (KBr disk): 3283 (s), 2964 (s), 1611 (vs), 1085 (vs), 874 (s) cm<sup>-1</sup>. <sup>1</sup>H NMR (400 MHz, CDCl<sub>3</sub>): 1.18 (d, *J* = 6.8 Hz, 6H,

CH(CH<sub>3</sub>)<sub>2</sub>), 2.79–2.86 (m, 1H, CH(CH<sub>3</sub>)<sub>2</sub>), 4.63 (s, 4H, 2CH<sub>2</sub>), 4.81 (br.s, 2H, 2OH), 7.04 (s, 2H, C<sub>5</sub>H<sub>2</sub>N), ppm. <sup>13</sup>C{<sup>1</sup>H} NMR (100 MHz, CDCl<sub>3</sub>): 23.1, 33.7 (CH(CH<sub>3</sub>)<sub>2</sub>), 64.5 (CH<sub>2</sub>), 117.9, 159.0, 159.7 (C<sub>6</sub>H<sub>4</sub>) ppm. MS (ESI, CH<sub>2</sub>Cl<sub>2</sub>): m/z 182.2 [M<sup>+</sup>].

## (2) Preparation of 2,6-bis[(tosyloxy)methyl]-4-*i*-propylpyridine

This new starting material was prepared from the above-prepared precursor by using a reported procedure with some modifications.<sup>2</sup> To a stirred mixture consisting of 2,6-bis(hydroxymethyl)-4-*i*-propylpyridine (1.813 g, 10 mmol), CH<sub>2</sub>Cl<sub>2</sub> (60 mL), and 40 % aqueous KOH solution (60 mL), tosyl chloride (3.81 g, 20 mmol) was added. The mixture was stirred at 0 °C for 1 h and at room temperature for about 4 h until the fluorescence TLC analysis showed that the starting material 2,6-bis(hydroxymethyl)-4-*i*-propylpyridine was completely consumed. After water (60 mL) was added, the resulting mixture was extracted with CH<sub>2</sub>Cl<sub>2</sub> (60 mL×3) and then the combined organic phase was dried over anhydrous MgSO<sub>4</sub>. After removal of the drying agent and solvents, the residue was recrystallized from CH<sub>2</sub>Cl<sub>2</sub>/hexane to give 2,6-bis[(tosyloxy)methyl]-4-*i*-propylpyridine (4.308 g, 88%) as a white solid, mp 59–61 °C. Anal. Calcd for C<sub>24</sub>H<sub>27</sub>NO<sub>6</sub>S<sub>2</sub>: C, 58.88; H, 5.56; N, 2.86. Found: C, 58.81; H, 5.59; N, 2.96. IR (KBr disk): 2966 (m), 1609 (s), 1364 (vs), 1176 (vs), 834 (s), 554 (vs) cm<sup>-1</sup>. <sup>1</sup>H NMR (400 MHz, CDCl<sub>3</sub>): 1.18 (d, *J* = 6.8 Hz, 6H, CH(CH<sub>3</sub>)<sub>2</sub>), 2.43 (s, 6H, 2C<sub>6</sub>H<sub>4</sub>CH<sub>3</sub>), 2.82–2.86 (m, 1H, CH(CH<sub>3</sub>)<sub>2</sub>), 5.02 (s, 4H, 2CH<sub>2</sub>), 7.12 (s, 2H, C<sub>5</sub>H<sub>2</sub>N), 7.32, 7.79 (dd, AX system, *J* = 8.2 Hz, 8H, 2C<sub>6</sub>H<sub>4</sub>) ppm. <sup>13</sup>C{<sup>1</sup>H} NMR (100 MHz, CDCl<sub>3</sub>): 21.8 (C<sub>6</sub>H<sub>4</sub>CH<sub>3</sub>), 23.1, 33.9 (CH(CH<sub>3</sub>)<sub>2</sub>), 71.7 (C<sub>5</sub>H<sub>2</sub>N), 119.9, 128.2, 130.0, 132.9, 145.2, 153.5, 160.2 (C<sub>6</sub>H<sub>4</sub>) ppm. MS (ESI, CH<sub>2</sub>Cl<sub>2</sub>): m/z 490.3 [M<sup>+</sup>].

## 2. Thermal decomposition experiments of trinuclear complexes 2a-2e.







A 50 mL three-necked flask equipped with a magnetic stir-bar, a serum cap, a N<sub>2</sub> inlet tube and a reflux condenser topped with a N<sub>2</sub> outlet tube was charged with **2a** (35 mg, 0.05 mmol) and CH<sub>2</sub>Cl<sub>2</sub> (5 mL). After the stirred mixture was refluxed for 12 h, it was subjected to flash column chromatography under anaerobic conditions. First, CH<sub>2</sub>Cl<sub>2</sub> eluted a brown-red band from which the unreacted **2a** (21 mg, 61%) was recovered. Then, CH<sub>2</sub>Cl<sub>2</sub>/acetone (v/v = 4:1) eluted a red band from which product **3a** (5 mg, 21%) was obtained.

**(2) Thermal decomposition experiment of 2a in refluxing CH<sub>2</sub>Cl<sub>2</sub> in air.**

A 50 mL three-necked flask equipped with a condenser was charged with **2a** (35 mg, 0.05 mmol) and CH<sub>2</sub>Cl<sub>2</sub> (5 mL). The mixture was refluxed for 12 h and then the resulting mixture was subjected to flash column chromatography in air. No **2a** was recovered due to its decomposition during the refluxing and isolation courses in air. CH<sub>2</sub>Cl<sub>2</sub>/acetone (v/v = 4:1) eluted a tiny red band from which product **3a** (2.5 mg, 10%) was obtained.





A 50 mL three-necked flask equipped with a magnetic stir-bar, two serum caps and a N<sub>2</sub> inlet tube was charged with **2b** (36 mg, 0.05 mmol) and CH<sub>2</sub>Cl<sub>2</sub> (5 mL). After the mixture was stirred at room temperature for 12 h, it was subjected to flash column chromatography under anaerobic conditions. First, CH<sub>2</sub>Cl<sub>2</sub> eluted a brown-red band from which the unreacted **2b** (24 mg, 69%) was recovered. Then, CH<sub>2</sub>Cl<sub>2</sub>/acetone (v/v = 4:1) eluted a red band from which product **3b** (3 mg, 12%) was obtained. Similarly, by using trinuclear complex **2c** (36 mg, 0.05 mmol), **2d** (39 mg, 0.05 mmol), or **2e** (37 mg, 0.05 mmol), the unreacted **2c** (26 mg, 72%), **2d** (27 mg, 69%), or **2e** (27 mg, 73%) was recovered and the corresponding product **3c** (2.8 mg, 11%), **3d** (4 mg, 15%), or **3e** (4 mg, 16%) was obtained.







A 50 mL three-necked flask equipped with a condenser was charged with **2b** (36 mg, 0.05 mmol) and CH<sub>2</sub>Cl<sub>2</sub> (5 mL). The mixture was stirred at room temperature for 12 h then the resulting mixture was subjected to flash column chromatography. No **2b** was recovered due to its decomposition during the stirring and isolation courses in air. CH<sub>2</sub>Cl<sub>2</sub>/acetone (v/v = 4:1) eluted a tiny red band from which product **3b** (1.5 mg, 6%) was obtained. Similarly, by using **2c** (36 mg, 0.05 mmol), **2d** (39 mg, 0.05 mmol), or **2e** (37 mg, 0.05 mmol), no **2c**, **2d** or **2e** was recovered. The corresponding product **3c** (1.2 mg, 5%), **3d** (1.6 mg, 6%), or **3e** (1.8 mg, 7%) was obtained.

### 3. Tables S1 and S2: Selected bond lengths (Å) and angles (°) for **2b** and **3c**

**Table S1. Selected bond lengths (Å) and angles (°) for **2b****

|                   |            |                   |            |
|-------------------|------------|-------------------|------------|
| Ni(1)-N(1)        | 2.042(2)   | Ni(1)-S(1)        | 2.2130(11) |
| Ni(1)-S(3)        | 2.2609(9)  | Ni(1)-Fe(1)       | 2.4737(8)  |
| Ni(1)-Fe(2)       | 2.4574(8)  | Fe(1)-Fe(2)       | 2.5900(10) |
| Fe(1)-S(2)        | 2.2666(11) | Fe(2)-S(4)        | 2.2835(11) |
| N(1)-Ni(1)-Fe(1)  | 113.58(7)  | S(3)-Ni(1)-Fe(1)  | 156.61(3)  |
| S(1)-Ni(1)-Fe(1)  | 57.24(3)   | Ni(1)-Fe(1)-Fe(2) | 58.009(19) |
| Fe(1)-Ni(1)-Fe(2) | 63.37(2)   | Fe(1)-Fe(2)-S(4)  | 86.80(4)   |
| Ni(1)-Fe(2)-Fe(1) | 58.62(2)   | Fe(2)-Fe(1)-S(2)  | 142.12(3)  |

**Table S2. Selected bond lengths (Å) and angles (°) for **3c****

|                 |           |                 |            |
|-----------------|-----------|-----------------|------------|
| O(1)-C(1)       | 1.138(2)  | Fe(1)-N(1)      | 1.9972(15) |
| Fe(1)-S(4)      | 2.1867(7) | Fe(1)-S(2)      | 2.2139(8)  |
| Fe(1)-S(1)      | 2.2868(7) | Fe(1)-S(3)      | 2.2991(7)  |
| N(1)-Fe(1)-S(3) | 90.10(5)  | S(4)-Fe(1)-S(3) | 89.91(2)   |
| O(1)-C(1)-Fe(1) | 178.9(2)  | C(2)-S(1)-Fe(1) | 102.48(6)  |
| C(7)-S(2)-Fe(1) | 104.18(6) | C(8)-S(2)-Fe(1) | 97.43(6)   |

#### 4. Figures S1 and S2: Molecular structures of 2b and 3c

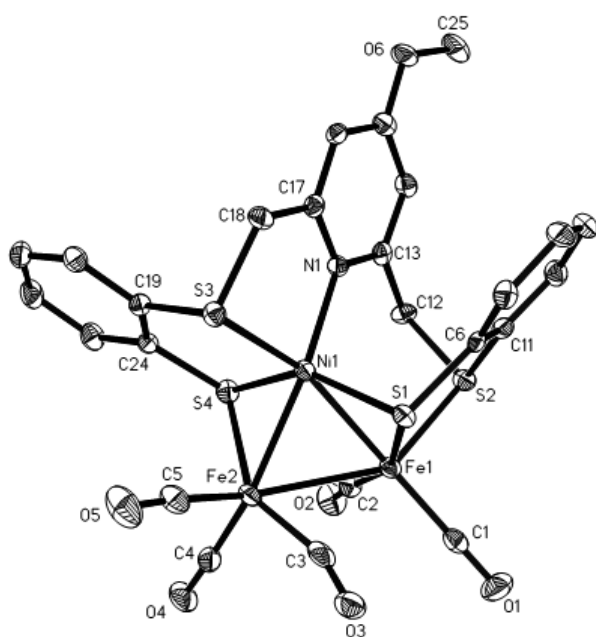

**Figure S1.** Molecular structure of **2b** with 30% probability level ellipsoids.

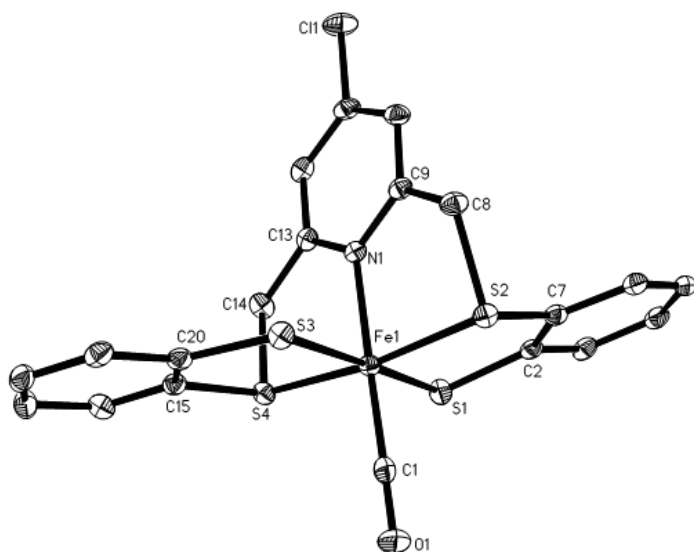

**Figure S2.** Molecular structure of **3c** with 30% probability level ellipsoids.

**5. Figure S3: Plots of  $i_p$  versus  $v^{1/2}$  for 2a**

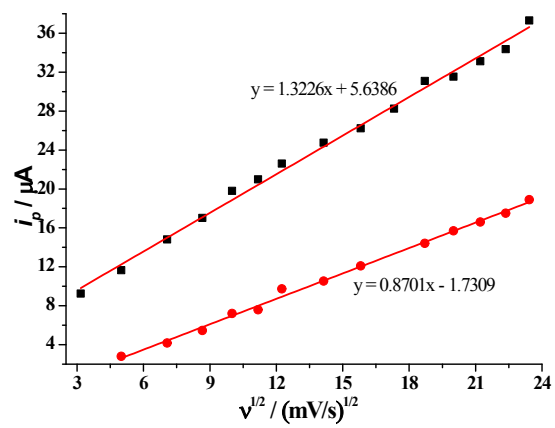





**6. Figure S4: Cyclic voltammograms of 2b-2e with TFA**

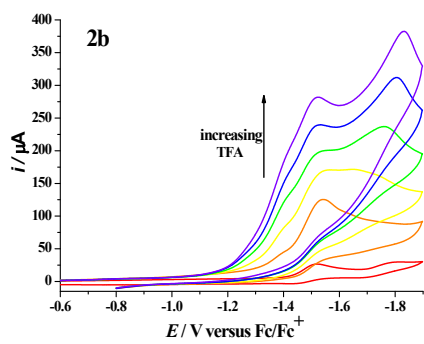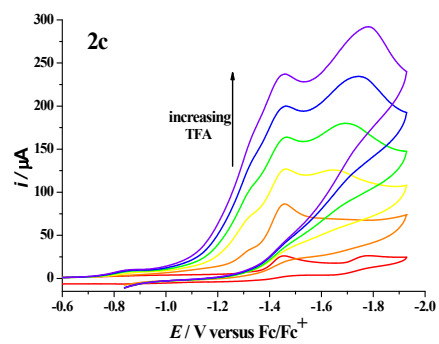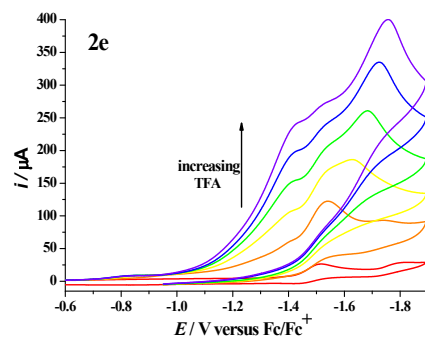







## 7. Figures S5 and S6: Overpotential determinations for 2a-2e

Since the  $pK_a$  and the standard redox potential are known for MeCN solutions of TFA ( $pK_a^{\text{MeCN}} = 12.7$ ,<sup>3</sup> homoconjugation not taken into account), the  $E^{o,\text{MeCN}}(\text{TFA}/\text{H}_2) = -0.89 \text{ V}$  vs  $\text{Fc}/\text{Fc}^+$  can be calculated using Evans' relationship.<sup>4</sup> The overpotential of 525 mV for the electrocatalytic proton reduction catalyzed by **2a** is measured from the potential at 0.5 ( $i_{\text{pc}}$ ), where  $i_{\text{pc}}$  is the cathodic peak current in the cyclic voltammogram recorded after addition of 100 equivalents of TFA (Figure S5).

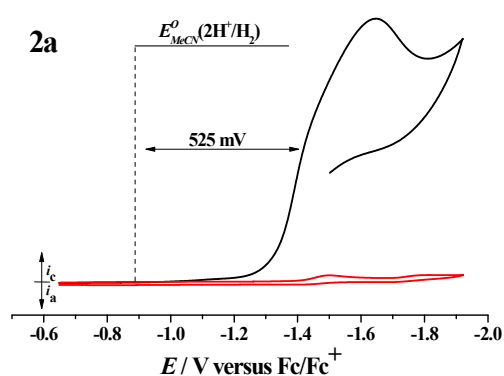





The overpotentials for **2b-2e** can also be calculated by Evans' relationship (Figure S6).

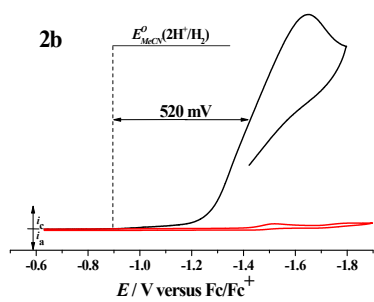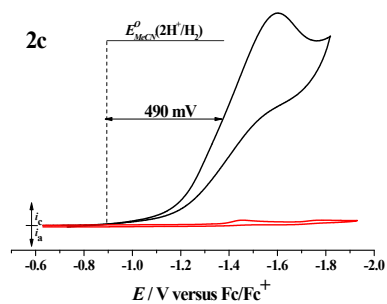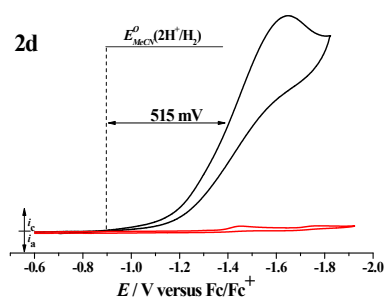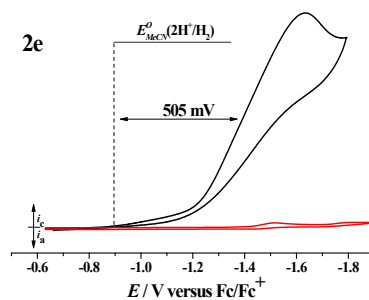









8. Figure S7: Plot of  $i_p$  versus  $v^{1/2}$  for 3a

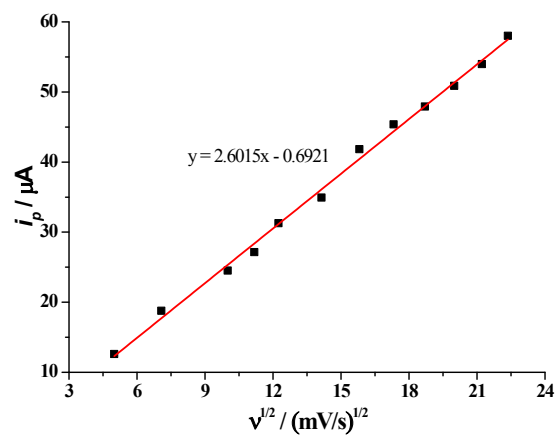



9. Figure S8: Cyclic voltammograms of 3b-3e with TFA

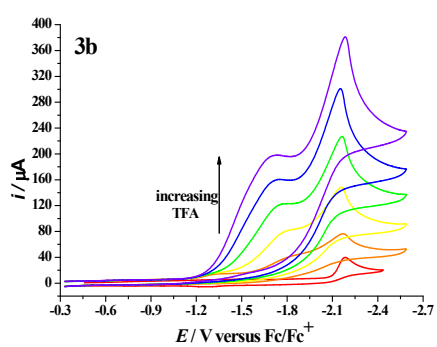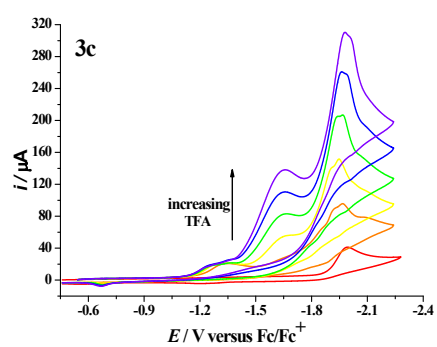

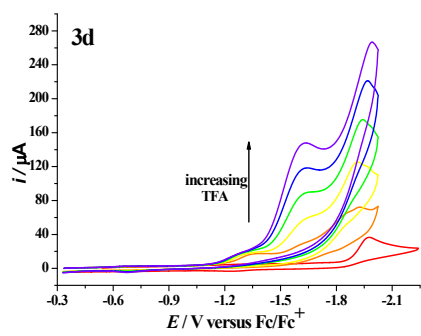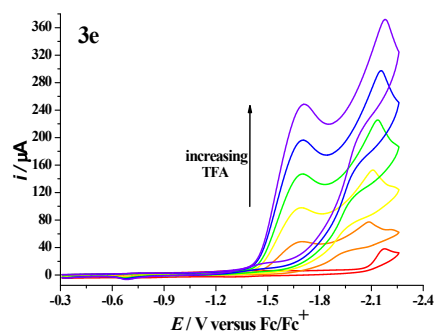



## 10. Figure S9: Overpotential determinations for 3a-3e

The overpotentials for **3a-3e** can also be calculated by Evans' relationship (Figure S9).

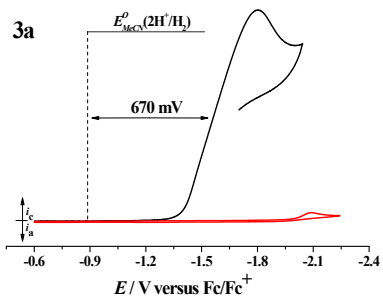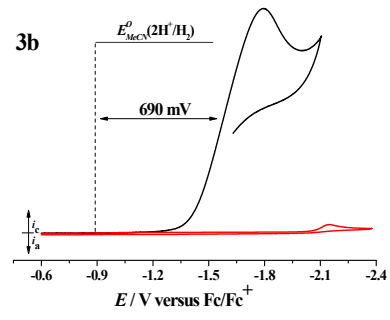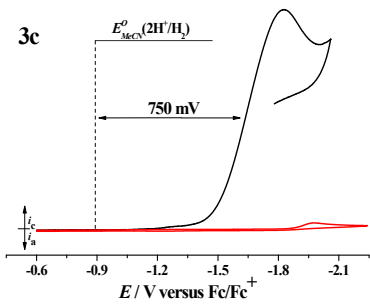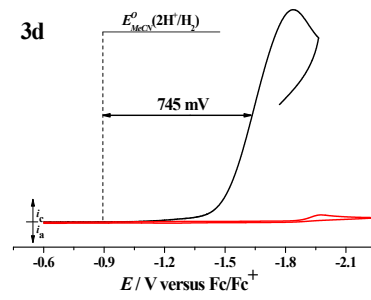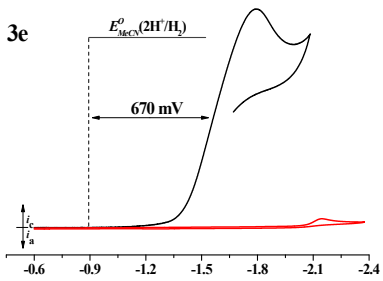







## 11. References

- 1 R. Shelkov, A. Melman, *Eur. J. Org. Chem.* 2005, 1397-1401.











- 4 G. A. N. Felton, R. S. Glass, D. L. Lichtenberger and D. H. Evans, *Inorg. Chem.* 2006, **45**, 9181-9184.
